# Supplementary material for: Polo-like kinase 3 and phosphoT273 caspase-8 are associated with improved local tumor control and survival in patients with anal carcinoma treated with concomitant chemoradiotherapy
Source: PubMed Central journal article supplement (PMC5288191; doi:10.18632/oncotarget.10801), 2016-07-23
Supplement: oncotarget-07-53339-s001.pdf [file oncotarget-07-53339-s001.pdf]

## Polo-like kinase 3 and phosphoT273 caspase-8 are associated with improved local tumor control and survival in patients with anal carcinoma treated with concomitant chemoradiotherapy

### Supplementary Materials

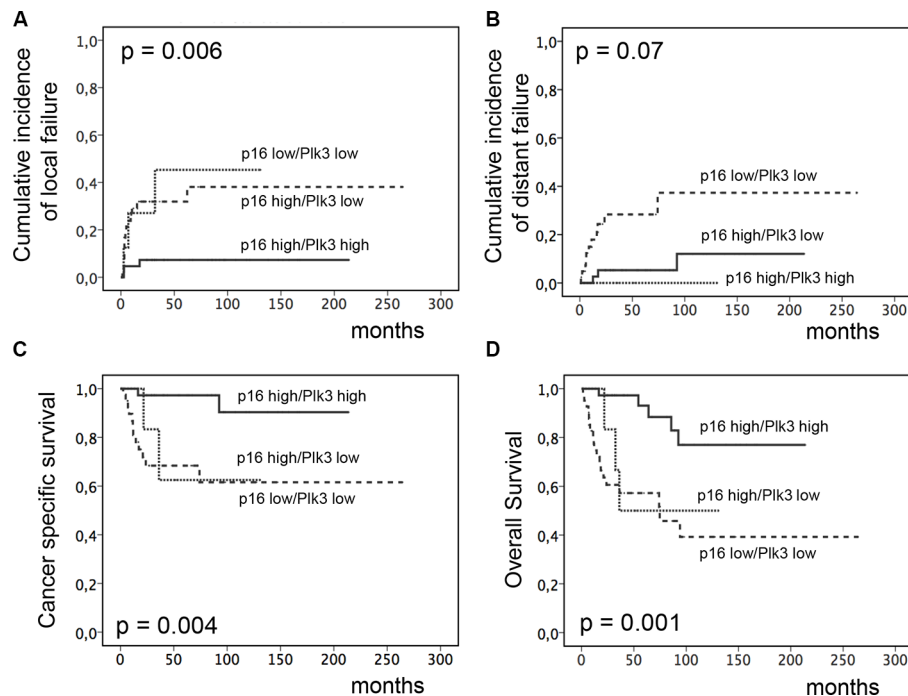

**Supplementary Figure S1: Incidence of locoregional and distant failure, CSS and OS according to combined p16INK4a and Plk3 expression.** Cumulative incidence of locoregional (A) and distant failure (B), CSS (C) and OS (D) according to combined p16<sup>INK4a</sup> and Plk3 expression (high Plk3 and high p16<sup>INK4a</sup> vs. high Plk3 and low vs. low Plk3 and low p16<sup>INK4a</sup>) in pretreatment biopsies of patients with anal carcinoma treated with definitive CRT.

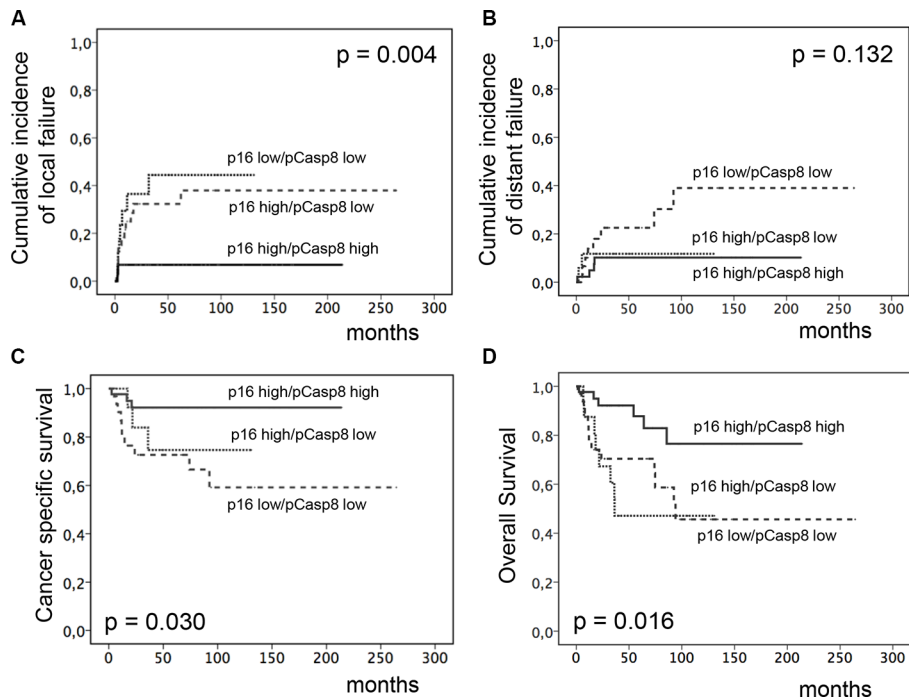

**Supplementary Figure S2: Incidence of locoregional and distant failure, CSS and OS according to combined p16<sup>INK4a</sup> and pT273 caspase-8 expression.** Cumulative incidence of locoregional (A) and distant failure (B), CSS (C) and OS (D) according to combined p16<sup>INK4a</sup> and pT273 caspase-8 levels (high pT273 caspase-8 and high p16<sup>INK4a</sup> vs. high pT273 caspase-8 and low p16<sup>INK4a</sup> vs. low pT273 caspase-8 and low p16<sup>INK4a</sup>) in pretreatment biopsies of patients with anal carcinoma treated with definitive CRT.

**Supplementary Table S1: Univariate and multivariate analyses of prognostic factors and combined HPV16 DNA load/p16<sup>INK4a</sup> and Plk3 or HPV16 DNA load/p16<sup>INK4a</sup> and pT273 Caspase 8 variable in patients with anal SCC**

|                                              | Multivariate                  |       |         |        |                 |
|----------------------------------------------|-------------------------------|-------|---------|--------|-----------------|
|                                              | Univariate<br><i>p</i> -value | HR    | 95 % CI |        | <i>p</i> -value |
|                                              |                               |       | lower   | upper  |                 |
| <b>Cumulative incidence of local failure</b> |                               |       |         |        |                 |
| <i>N</i> -stage (N1-3/N0)                    | < <b>0.001</b>                | 6.15  | 1.90    | 19.84  | <b>0.002</b>    |
| combined HPV16 load/Plk3 <sup>a</sup>        | <b>0.001</b>                  | 16.77 | 2.09    | 134.0  | <b>0.008</b>    |
| combined HPV16 load/pT273                    | <b>0.009</b>                  | 11.18 | 0.72    | 171.66 | 0.083           |
| combined p16 <sup>INK4a</sup> /Plk3          | <b>0.006</b>                  | 5.80  | 0.94    | 35.65  | 0.058           |
| combined p16 <sup>INK4a</sup> /pT273         | <b>0.004</b>                  | 3.33  | 0.77    | 14.33  | 0.106           |
| <b>Cancer-specific survival</b>              |                               |       |         |        |                 |
| <i>N</i> -stage (N 1-3/N 0)                  | < <b>0.001</b>                | 6.72  | 2.03    | 22.26  | <b>0.002</b>    |
| combined HPV16 load/Plk3                     | <b>0.016</b>                  | 10.21 | 1.18    | 55.36  | <b>0.007</b>    |
| combined HPV16 load/pT273                    | <b>0.023</b>                  | 2.58  | 0.20    | 32.94  | 0.605           |
| combined p16 <sup>INK4a</sup> /Plk3          | <b>0.004</b>                  | 7.22  | 1.53    | 34.00  | <b>0.012</b>    |
| combined p16 <sup>INK4a</sup> /pT273         | <b>0.030</b>                  | 2.19  | 0.62    | 7.68   | 0.221           |
| <b>Overall survival</b>                      |                               |       |         |        |                 |
| <i>N</i> -stage (N 1-3/N 0)                  | <b>0.002</b>                  | 4.30  | 1.77    | 10.42  | <b>0.05</b>     |
| combined HPV16 load/Plk3                     | <b>0.003</b>                  | 9.18  | 2.28    | 36.97  | <b>0.002</b>    |
| combined HPV16 load/pT273                    | <b>0.003</b>                  | 3.44  | 0.58    | 20.28  | 0.171           |
| combined p16 <sup>INK4a</sup> /Plk3          | <b>0.004</b>                  | 5.08  | 1.80    | 14.31  | <b>0.002</b>    |
| combined p16 <sup>INK4a</sup> /pT273         | <b>0.001</b>                  | 2.14  | 0.67    | 6.83   | 0.179           |
